# Supplementary material
Source: publisher site journal article supplement (https://www.dovepress.com/article/356371)
Supplement: Supplementary file 1 [file get_supplementary_file.php]

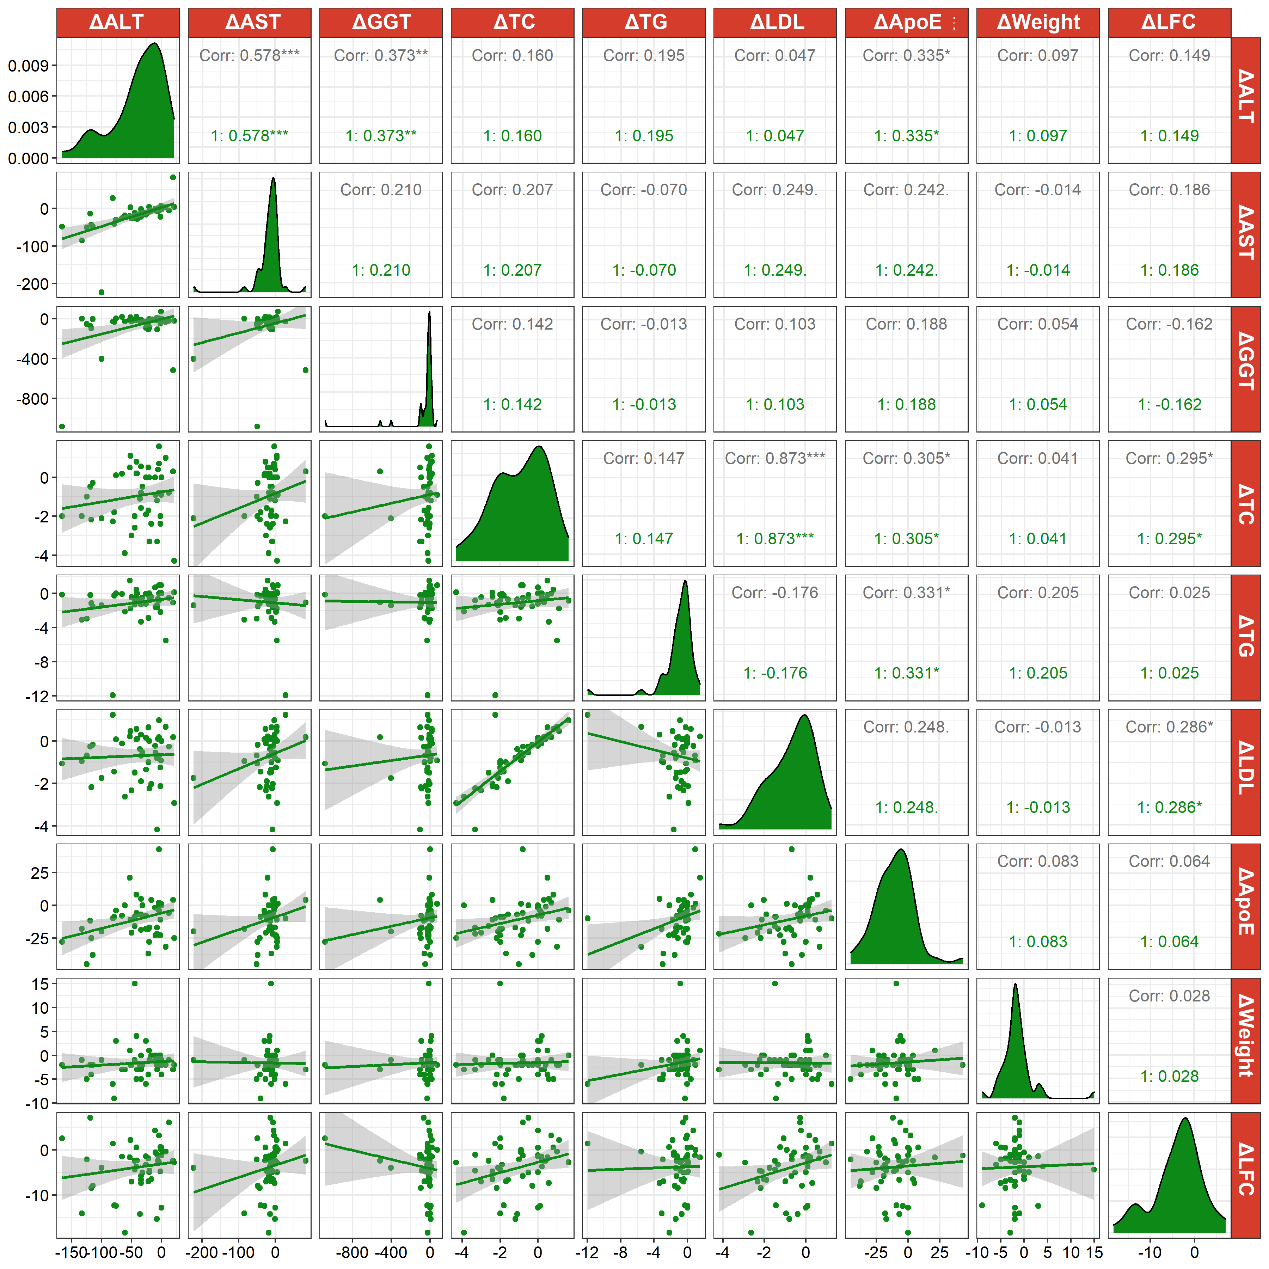


**Supplementary Figure 1** Correlation analysis between changes in liver fat content and blood lipids on lipid-lowering agents in 60 MAFLD patients by MRI-PDFF evidence.

****P*＜0.001, ***P*＜0.01. **P*＜0.05. △, changes; LFC, liver fat content; ALT, alanine aminotransferease; AST, aspartate aminotransferase; GGT, gamma glutamyltranspeptidase; TC, total cholesterol; TG, triglyceride; LDL-c, low-density lipoprotein cholesterol; ApoE, apolipoprotein E.

Supplementary table 1 Comparison of clinical and laboratory characteristics’ changes between lipid-lowering group and control group

| **Characteristics** | Lipid-lowering group(n=325) | | | | | | Control group(n=216) | | | | | | *P* |
| --- | --- | --- | --- | --- | --- | --- | --- | --- | --- | --- | --- | --- | --- |
| Baseline | 1 Month | 3 Months | 6 Months | 9 Months | 12 Months | Baseline | 1 Month | 3 Months | 6 Months | 9 Months | 12 Months |
| Weight, kg | 72.6±12.9 | 72.2±12.5 | 72.2±12.9 | 71.7±12.9 | 71.7±12.5 | 71.6±12.5 | 73.7±11.5 | 73.7±11.3 | 73.6±11.6 | 73.4±11.6 | 73.5±12.2 | 73.3±11.7 | 0.069 |
| BMI, kg/m2 | 26.0±3.5 | 25.7±3.4 | 25.7±3.4 | 25.6±3.4 | 25.6±3.4 | 25.5±3.4 | 26.0±3.1 | 26.1±3.4 | 26.4±5.7 | 26.0±3.3 | 26.0±3.3 | 26.0±3.3 | 0.145 |
| WC, cm | 88.4±9.3 | 87.0±9.0 | 87.6±9.0 | 87.5±9.3 | 87.4±9.1 | 87.4±8.8 | 89.3±8.2 | 89.4±8.7 | 89.2±8.9 | 89.4±8.9 | 89.4±8.9 | 89.3±8.8 | 0.065 |
| SBP, mmHg | 129±16 | 130±16 | 130±17 | 130±17 | 129±17 | 129±16 | 128±16 | 128±16 | 128±15 | 128±16 | 128±16 | 128±15 | 0.430 |
| DBP, mmHg | 84±13 | 85±13 | 84±13 | 84±13 | 85±13 | 84±13 | 83±13 | 83±12 | 83±13 | 83±12 | 83±12 | 83±12 | 0.251 |
| ALT, U/L | 80±37 | 54±29 | 44±25 | 36±26 | 32±17 | 26±15 | 78±34 | 76±34 | 77±33 | 76±33 | 75±34 | 74±33 | ＜0.001 |
| AST, U/L | 52±31 | 45±29 | 33±16 | 28±10 | 26±9 | 25±13 | 53±33 | 50±29 | 48±23 | 50±22 | 48±22 | 49±22 | ＜0.001 |
| GGT, U/L | 89±61 | 72±48 | 57±37 | 50±30 | 44±22 | 40±19 | 89±58 | 93±55 | 85±50 | 83±46 | 85±47 | 82±41 | ＜0.001 |
| TC, mmol/L | 6.1±1.3 | 5.2±1.2 | 4.6±1.0 | 4.0±0.7 | 3.7±0.7 | 3.6±0.7 | 6.0±1.0 | 5.8±1.1 | 5.5±1.0 | 5.7±1.0 | 5.7±0.9 | 5.9±1.1 | ＜0.001 |
| TG, mmol/L | 3.1±1.9 | 2.3±1.4 | 1.8±1.0 | 1.6±0.9 | 1.5±0.7 | 1.4±0.7 | 2.9±1.7 | 2.8±1.6 | 2.8±1.6 | 2.6±1.5 | 2.7±1.5 | 2.7±1.4 | ＜0.001 |
| HDL-c, mmol/L | 1.2±0.5 | 1.2±0.4 | 1.2±0.6 | 1.2±0.4 | 1.2±0.4 | 1.2±0.4 | 1.2±0.4 | 1.2±0.4 | 1.2±0.4 | 1.2±0.4 | 1.2±0.4 | 1.2±0.4 | 0.490 |
| LDL-c, mmol/L | 4.0±0.9 | 3.1±1.0 | 2.6±0.8 | 2.6±0.8 | 2.5±0.8 | 2.4±0.8 | 3.9±0.8 | 3.8±0.8 | 3.7±0.7 | 3.7±0.6 | 3.8±0.7 | 3.8±0.7 | ＜0.001 |
| ApoA-1, g/L | 1.4±0.5 | 1.4±0.4 | 1.4±0.3 | 1.4±0.3 | 1.4±0.3 | 1.4±0.3 | 1.3±0.3 | 1.3±0.3 | 1.4±0.3 | 1.4±0.3 | 1.4±0.3 | 1.4±0.3 | 0.991 |
| ApoB, g/L | 1.1±0.3 | 1.1±0.3 | 1.0±0.3 | 1.0±0.2 | 1.0±0.2 | 1.0±0.3 | 1.1±0.2 | 1.0±0.2 | 1.0±0.2 | 1.0±0.2 | 1.0±0.2 | 1.0±0.2 | 0.941 |
| ApoE, mg/L | 57±28 | 48±34 | 47±26 | 46±22 | 47±22 | 47±25 | 54±22 | 54±23 | 57±42 | 57±42 | 57±42 | 57±40 | 0.011 |
| LP-A, mg/L | 204±192 | 175±182 | 198±203 | 199±200 | 208±249 | 202±209 | 193±179 | 176±180 | 178±182 | 164±149 | 161±153 | 199±190 | 0.326 |
| UA, μmol/l | 416±104 | 400±104 | 400±106 | 394±112 | 395±110 | 392±103 | 415±106 | 421±94 | 423±98 | 383±98 | 399±107 | 407±116 | 0.566 |
| FFA, mmol/L | 572±220 | 564±251 | 541±248 | 482±176 | 436±125 | 418±104 | 543±177 | 546±179 | 532±192 | 513±167 | 508±164 | 519±162 | 0.305 |
| FBG, mmol/L | 5.6±1.2 | 5.4±1.0 | 5.4±0.9 | 5.3±0.9 | 5.3±0.9 | 5.4±1.0 | 5.5±1.3 | 5.3±1.0 | 5.2±0.8 | 5.2±0.8 | 5.2±0.9 | 5.3±1.2 | 0.245 |
| FINS, μU/mL | 12.1±9.6 | 12.0±9.9 | 11.5±8.6 | 11.5±8.9 | 11.4±8.7 | 11.3±8.6 | 11.5±6.0 | 11.3±6.9 | 11.8±8.0 | 11.5±7.8 | 11.6±7.9 | 11.5±7.9 | 0.859 |
| HOMA-IR | 3.1±3.2 | 3.2±3.3 | 3.0±2.8 | 3.0±3.0 | 3.0±3.0 | 3.0±2.8 | 2.8±1.7 | 2.5±2.0 | 2.4±1.6 | 2.3±1.4 | 2.5±2.0 | 2.8±1.9 | 0.164 |
| LSM, kPa | 6.5±2.4 | 6.3±1.7 | 6.3±1.7 | 6.3±1.6 | 6.3±1.6 | 6.4±2.3 | 6.1±2.6 | 6.1±1.6 | 6.4±2.0 | 6.5±2.0 | 6.4±1.9 | 6.6±2.0 | 0.835 |

**Notes:** repeated-measures analysis of variance (ANOVA) for the comparison of effects on parameters between lipid-lowering group and control group.

*P* values were for the ANOVA analysis between the two groups.

**Abbreviations:** BMI, body mass index; WC, waist circumference; SBP, systolic blood pressure; DBP, diastolic blood pressure; ALT, alanine aminotransferease; AST, aspartate aminotransferase; GGT, gamma glutamyltranspeptidase; TC, total cholesterol; TG, triglyceride; HDL-c, high-density lipoprotein cholesterol; LDL-c, low-density lipoprotein cholesterol; ApoA-1, apolipoprotein A-1; ApoB, apolipoprotein B; ApoE, apolipoprotein E; LP-A, lipoprotein-A; UA, uric acid; FFA, free fatty acid; FBG, fasting blood glucose; FINS, fasting insulin; HOMA-IR, homeostatic model assessment of insulin resistance; LSM, liver stiffness measurement.

Supplementary table 2 Comparison of clinical and laboratory characteristics at baseline and 12 months in 60 MAFLD patients with MRI-PDFF evidence

| Characteristics | Baseline | 12 Months | *P* |
| --- | --- | --- | --- |
| Weight, kg | 72.4±10.7 | 71.3±11.2 | 0.611 |
| BMI, kg/m2 | 26.1±2.6 | 26.0±2.9 | 0.562 |
| WC, cm | 91.3±6.8 | 89.0±7.6 | 0.121 |
| SBP, mmHg | 131±14 | 130±14 | 0.768 |
| DBP, mmHg | 86±11 | 83±11 | 0.206 |
| ALT, U/L | 73±40 | 34±21 | ＜0.001 |
| AST, U/L | 49±37 | 32±21 | 0.006 |
| GGT, U/L | 95±42 | 71±38 | 0.04 |
| TC, mmol/L | 5.9±1.1 | 4.9±1.2 | ＜0.001 |
| TG, mmol/L | 2.7±2.1 | 1.6±0.7 | 0.002 |
| HDL-c, mmol/L | 1.2±0.3 | 1.2±0.3 | 0.717 |
| LDL-c, mmol/L | 3.8±0.9 | 3.0±0.9 | ＜0.001 |
| ApoA-1, g/L | 1.4±0.3 | 1.4±0.6 | 0.802 |
| ApoB, g/L | 1.1±0.3 | 1.2±0.9 | 0.425 |
| ApoE, mg/L | 54±22 | 44±20 | 0.028 |
| LP-A, mg/L | 167±127 | 162±92 | 0.636 |
| UA, μmol/l | 411±113 | 360±80 | 0.012 |
| FFA, mmol/L | 565±181 | 586±236 | 0.756 |
| FBG, mmol/L | 5.4±2.0 | 5.0±1.2 | 0.234 |
| FINS, μU/mL | 12.0±6.0 | 10.8±5.2 | 0.377 |
| HOMA-IR | 3.0±2.3 | 2.8±2.0 | 0.751 |
| LFC（%） |  |  |  |
| Maximum（%） | 19.5±8.0 | 13.4±7.9 | 0.002 |
| Minimum（%） | 15.5±7.7 | 10.6±6.4 | 0.007 |
| Average（%） | 16.8±8.0 | 13.0±8.0 | 0.020 |

**Abbreviations:** BMI, body mass index; WC, waist circumference; SBP, systolic blood pressure; DBP, diastolic blood pressure; ALT, alanine aminotransferease; AST, aspartate aminotransferase; GGT, gamma glutamyltranspeptidase; TC, total cholesterol; TG, triglyceride; HDL-c, high-density lipoprotein cholesterol; LDL-c, low-density lipoprotein cholesterol; ApoA-1, apolipoprotein A-1; ApoB, apolipoprotein B; ApoE, apolipoprotein E; LP-A, lipoprotein-A; UA, uric acid; FFA, free fatty acid; FBG, fasting blood glucose; FINS, fasting insulin; HOMA-IR, homeostatic model assessment of insulin resistance; LFC, liver fat content.
